# Supplementary material
Source: PubMed Central journal article supplement (PMC5304419)
Supplement: NIHMS840553-supplement-Appendix.pdf [file NIHMS840553-supplement-Appendix.pdf]

Grogan CM, Andrews C, Abraham A, Humphreys K, Pollack HA, Smith BT, et al. Survey highlights differences in Medicaid coverage for substance use treatment and opioid use disorder medications. Health Aff (Millwood). 2016;35(12).

Appendix A1: ASAM Continuum and SUD Treatments by Level of Care

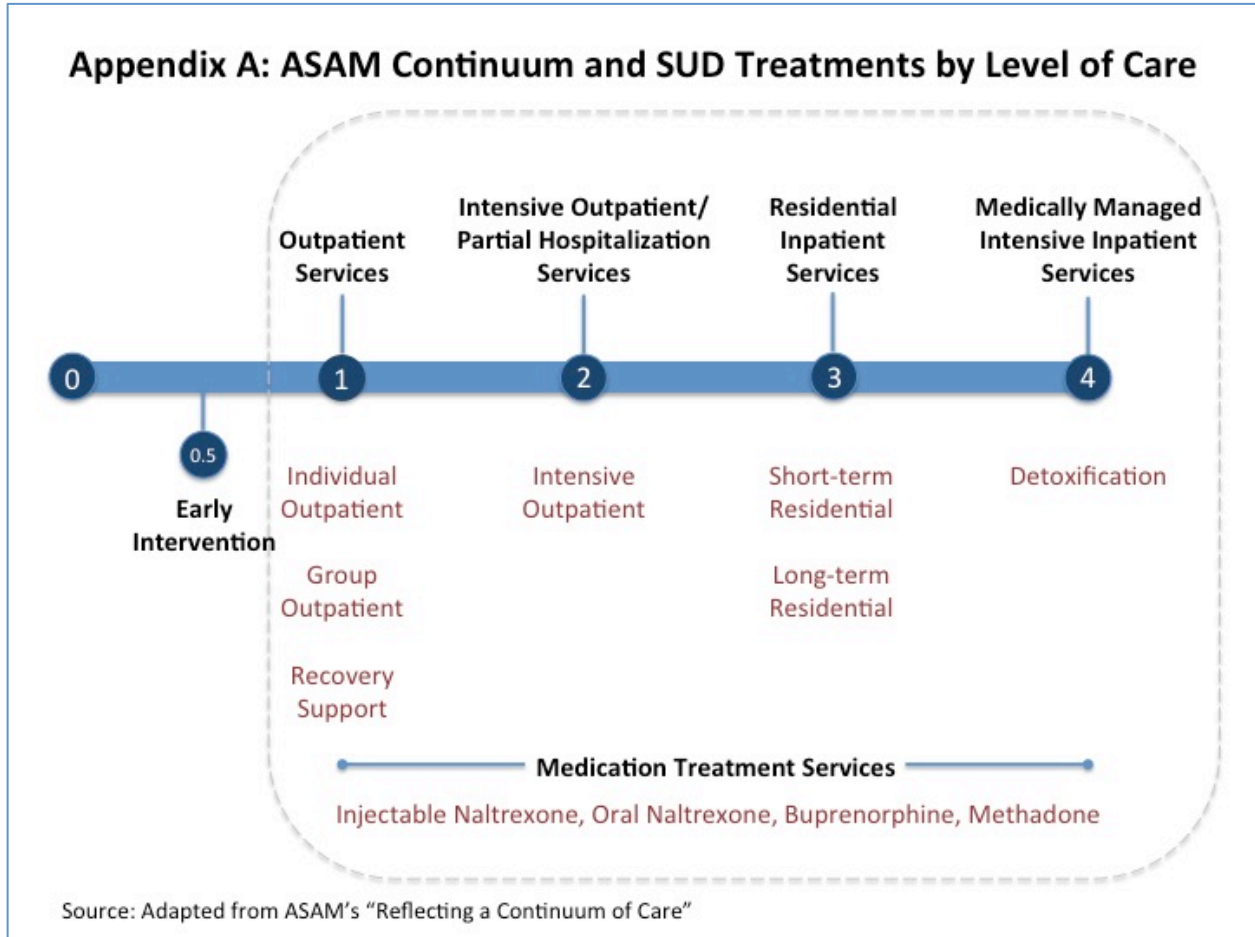

## Appendix A2: Medicaid Expansion States

Alaska  
Arkansas  
Arizona  
California  
Colorado  
Connecticut  
District of Columbia  
Montana  
North Dakota  
New Hampshire  
New Jersey  
New Mexico  
Nevada  
New York  
Ohio  
Oregon  
Pennsylvania  
Rhode Island  
Vermont  
Washington  
West Virginia
